# Supplementary material
Source: PubMed Central journal article supplement (PMC4194099)
Supplement: embj0033-1654-sd1.pdf [file embj0033-1654-sd1.pdf]

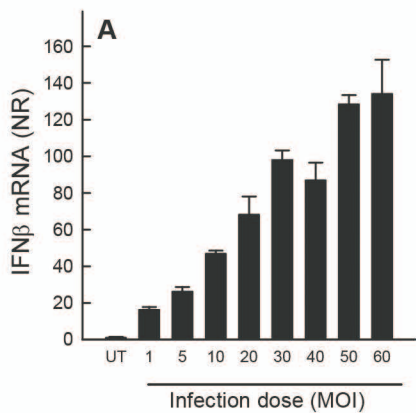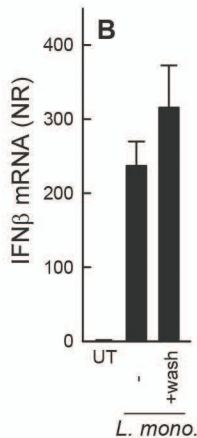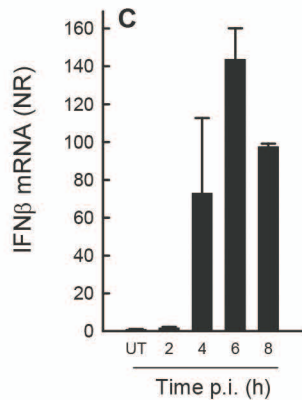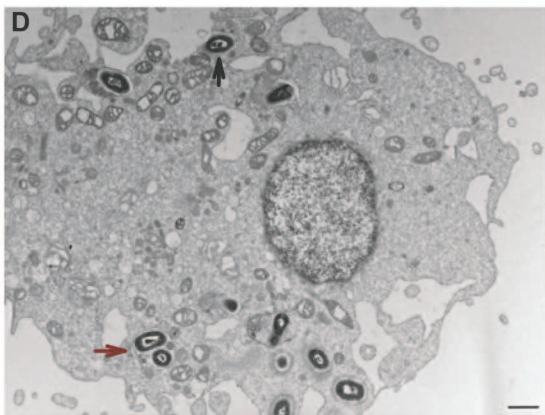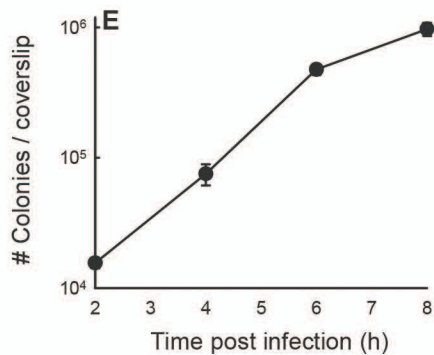

**Supplementary Figure S1. Time course and dose response for *L. monocytogenes*-induced IFN $\beta$  expression in human macrophages.** PMA-differentiated THP1 macrophages were infected with WT *L. monocytogenes* (strain LO28) and an MOI 1-60 (A) and MOI of 10 (B, C). (A) Total RNA was harvested for 6 hours post infection (A, B) or at the specified time point (C). In B, bacteria were further washed in PBS prior to infection. RT-qPCR for IFN $\beta$  was performed for analyses of mRNA expression. (D) The cells were infected for 4 h at an MOI of 25, fixed and analysed for intracellular bacteria using electron microscopy. Black arrows: example of cytoplasmic bacteria; Red arrows: example of vacuolar bacteria. Scale bar, 1  $\mu$ m. (E) The PMA-differentiated THP1 macrophages were infected at an MOI of 25. At the indicated time points p.i., cells were lysed and bacteria in the lysates were quantified. Data represent mean  $\pm$  SD of duplicates, representative of 3 independent experiments.
