# Supplementary material
Source: PubMed Central journal article supplement (PMC4194099)
Supplement: embj0033-1654-sd2.pdf [file embj0033-1654-sd2.pdf]

Figure S2

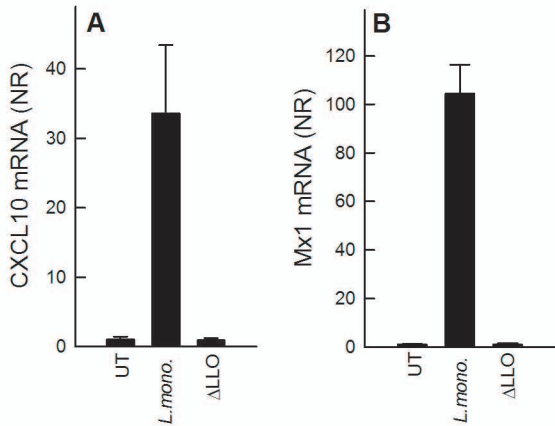

**Supplementary Figure S2. Induction of ISG expression by WT and LLO-deficient *L. monocytogenes*.** PMA-differentiated THP1 macrophages were infected with WT or LLO deficient ( $\Delta$ LLO) *L. monocytogenes* (moi 10) for 6 hours and RT-qPCR for (A) CXCL10 and (B) Mx1 was performed. Data represent mean +/- SD of duplicates, representative of 3 independent experiments.
