# Supplementary material
Source: PubMed Central journal article supplement (PMC4194099)
Supplement: embj0033-1654-sd3.pdf [file embj0033-1654-sd3.pdf]

**Figure S3**

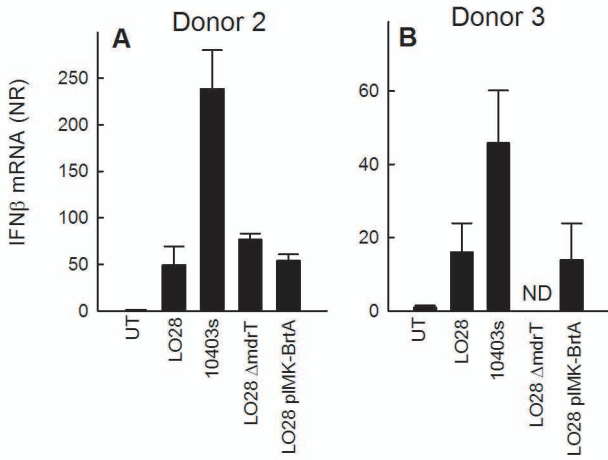

**Supplementary Figure S3. IFN $\beta$  induction by *L. monocytogenes* in human macrophages does not correlate with expression of the multidrug efflux pump MdrT.** Human primary monocyte-derived macrophages from two independent donors were infected with the *L. monocytogenes* strains LO28 and 10403s or LO28 mutants with altered expression of the multidrug efflux pump MdrT (MOI 25). Total RNA was isolated 6 hrs p.i and RT-qPCR analysis for IFN $\beta$  was performed. Data represents mean +/- SD of duplicates.
