# Supplementary material
Source: PubMed Central journal article supplement (PMC4194099)
Supplement: embj0033-1654-sd4.pdf [file embj0033-1654-sd4.pdf]

Figure S4

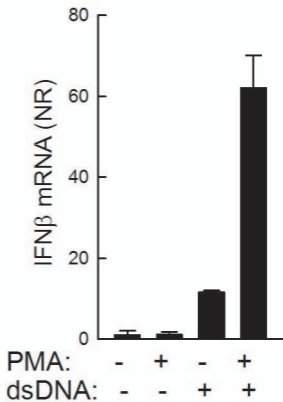

**Supplementary Figure S4. Differentiation of THP1 cells with PMA elevates responsiveness to DNA.** Parental THP1 cells or PMA-differentiated THP1 macrophages were stimulated with 2  $\mu\text{g/ml}$  of dsDNA or lipofectamine control for 6 h. Total RNA was isolated and IFN $\beta$  mRNA expression was evaluated by RT-qPCR. Data were normalized to  $\beta$ -actin and presented as means of triplicates  $\pm$  SD.
