# Supplementary material
Source: PubMed Central journal article supplement (PMC4194099)
Supplement: embj0033-1654-sd5.pdf [file embj0033-1654-sd5.pdf]

Figure S5

A

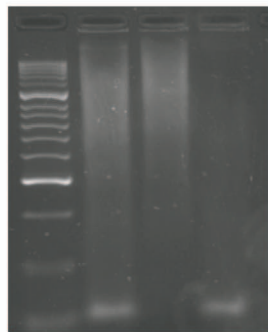

Extract  
Extract + RNase  
Extract + DNase

B

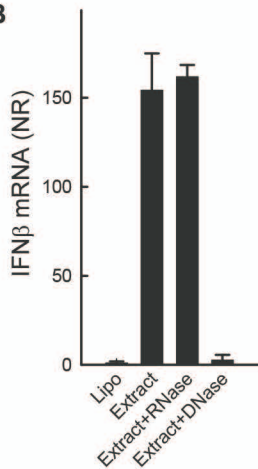

C

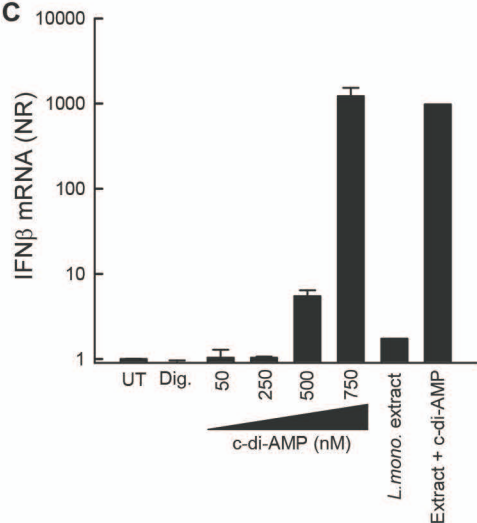

**Supplementary Figure S5. Visualisation of *L. monocytogenes* extracts left untreated or treated with RNase or DNase.**

*L. monocytogenes* overnight cultures were sonicated to generate bacterial extracts. These extracts were either left untreated or treated with RNase or DNase. (A) The extracts were run on 2% agarose gel and visualised by UV-light. (B) PMA-differentiated THP1 macrophages were transfected with *L. monocytogenes* total extracts or extracts pre-treated with either RNase or DNase. The cells were lysed 6 hrs post treatment and IFN $\beta$  mRNA induction was determined by RT-qPCR. (C) Heat-stable supernatant from *L. monocytogenes* extracts (+/- addition of 750 nM synthetic c-di-AMP) and increasing concentrations of synthetic c-di-AMP were transfected into THP1 cells using a digitonin-based system. Cells were incubated for 4.5 h, total RNA was isolated and IFN $\beta$  mRNA expression was determined by RT-qPCR. Data represent mean +/- SD of duplicates, representative of 3 independent experiments.
