# Supplementary material
Source: PubMed Central journal article supplement (PMC4194099)
Supplement: embj0033-1654-sd7.pdf [file embj0033-1654-sd7.pdf]

Figure S7

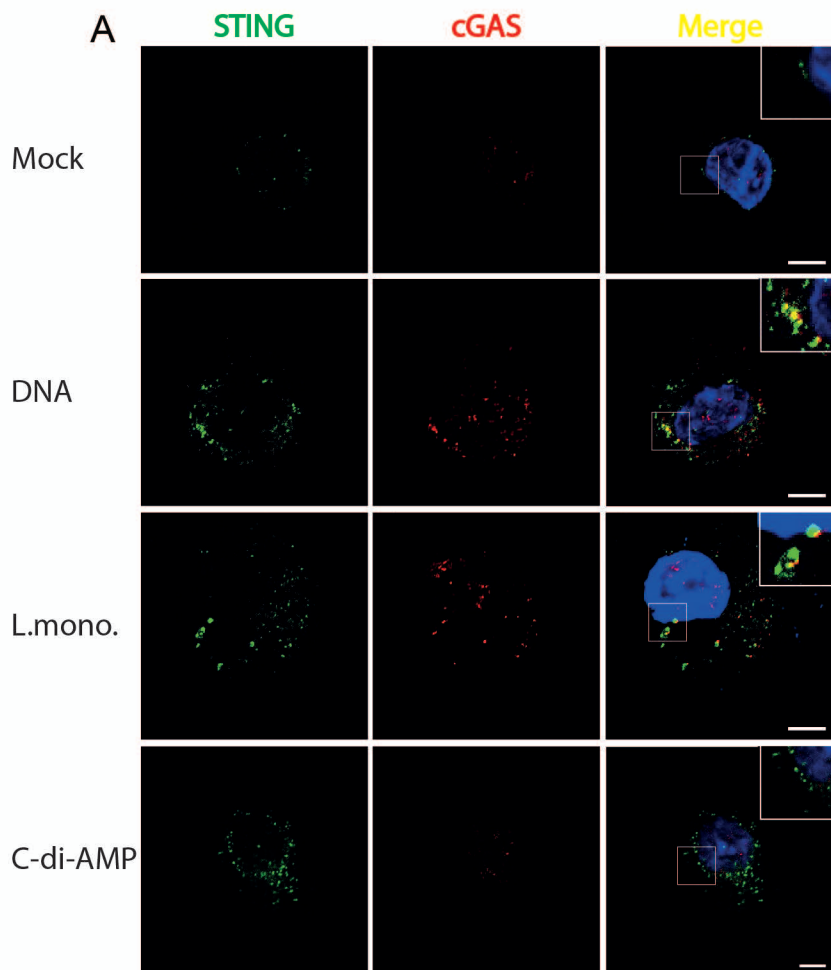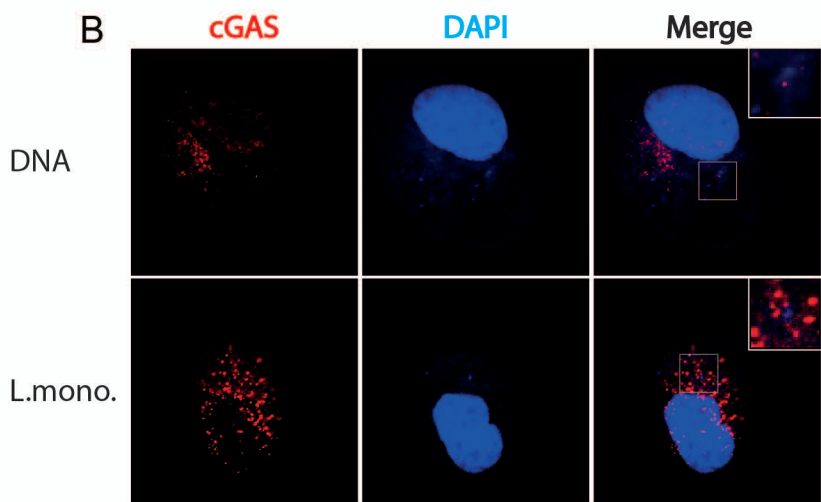

**Supplementary Figure S7. cGAS and STING co-localize in the cytoplasm after *L. monocytogenes* infection.** PMA-differentiated THP1 macrophages were transfected with 2 µg/ml of dsDNA, 3.6 µM of cyclicdi-AMP or infected with *L. monocytogenes* (strain LO28, MOI25). Four hours post-treatment the cells were fixed and stained with anti-cGAS and anti-STING antibodies. DNA was visualized by DAPI (blue). Scalebar, 5 µm.
